# Supplementary material for: PET governed fluorescence “Turn ON” BODIPY probe for selective detection of picric acid
Source: Royal Society of Chemistry journal article supplement (doi:10.1039/c5ra17932g), 2015-01-01
Supplement: c5ra17932g1.pdf [file c5ra17932g1.pdf]

## Supplementary Information

### PET governed fluorescence “Turn ON” BODIPY probe for selective detection of picric acid.

Yogesh Erande, Santosh Chemate, Ankush More and Nagaiyan Sekar\*

| Entry | Contents                                                                                                                                                                                                                                                                 | Page No.    |
|-------|--------------------------------------------------------------------------------------------------------------------------------------------------------------------------------------------------------------------------------------------------------------------------|-------------|
| 1     | Synthesis procedure of BODIPY-1                                                                                                                                                                                                                                          | S-2         |
| 2     | Synthesis procedure of BODIPY-2                                                                                                                                                                                                                                          | S-2         |
| 3     | <b>Fig.S1</b> - Fluorescence titration spectra of BODIPY-2 (1 $\mu$ M) upon incremental addition of PA (1–12 equiv.) in absolute ethanol, $\lambda_{\text{ex}} = 499$ nm. Inset: Calibration curve of fluorescence intensity as a function of PA equiv. to BODIPY probe. | S-2         |
| 4     | <b>Fig. S2</b> - Plot for detection limit calculation. LOD=0.655ppb was calculated by formula $\text{LOD}=3 \times \text{SD}/\text{slope}$ . SD obtained from 10 blank readings.                                                                                         | S-3         |
| 5     | <b>Fig. S3</b> - Isodensity plots for BODIPY-2 and its association with 1 and 2 equivalent of PA from B3LYP/6-31g(d) level optimised output files.                                                                                                                       | S-3         |
| 6     | <b>Fig. S4</b> - B3LYP/6-31g(d) Optimised structures with ball–stick model for BODIPY-2 and its association with 1 and 2 equivalent of PA. Ball colour – atom: gray-carbon, dark blue- nitrogen, pink-boron, red-oxygen, sky blue-fluorine, white-hydrogen.              | S-4         |
| 7     | <b>Fig. S5</b> - Normalized absorption, excitation and emission plot of BODIPY-2 + PA.                                                                                                                                                                                   | S-4         |
| 8     | <b>Fig.S6</b> - $^1\text{H}$ NMR (DMSO- $d_6$ , 500 MHz) spectrum of BODIPY-2.                                                                                                                                                                                           | S-5         |
| 9     | <b>Fig.S7</b> - $^{13}\text{C}$ NMR (DMSO- $d_6$ , 126 MHz) spectrum of BODIPY-2.                                                                                                                                                                                        | S-6         |
| 10    | <b>Fig.S8</b> - $^1\text{H}$ NMR ( $\text{cdcl}_3$ , 500 MHz) spectrum of BODIPY-1.                                                                                                                                                                                      | S-7         |
| 11    | <b>Fig.S9</b> - $^{13}\text{C}$ NMR ( $\text{cdcl}_3$ , 126 MHz) spectrum of BODIPY-1.                                                                                                                                                                                   | S-8         |
| 12    | Calculation of detection limit and binding constant                                                                                                                                                                                                                      | S-8         |
| 13    | Cartesian co ordinates of optimized files at B3LYP/6-31g(d) level                                                                                                                                                                                                        | S-9 to S-16 |

### Synthesis of BODIPY-1:

A solution of 3, 5-dinitrobenzoyl chloride (6.07g, 1eq.) and 2,4-dimethylpyrrole (5g, 2eq.) in dry dichloromethane(100ml) was stirred at 25°C for 24hours U/N<sub>2</sub>. To deep red coloured reaction mass Et<sub>3</sub>N (22.3ml, 6 eq.) was added slowly followed by BF<sub>3</sub>-Et<sub>2</sub>O (26.5ml, 8 eq.) after 30 min stirring. The solution was stirred for another 10 hours at 25°C. Then RM was washed thrice with 5% NaOH solution and then water. The organic layer was then dried over anhydrous Na<sub>2</sub>SO<sub>4</sub>, and concentrated in vacuo and purified by column chromatography on silica gel (hexane/dichloromethane as eluent) afford the pure BODIPY-1(Yield=58%).

### Synthesis of BODIPY-2:

5% Pd/C (1.4g) and hydrazine(3ml) were added to the N<sub>2</sub> gas purged solution of BODIPY -1 (1g) in THF and MeOH (1:1,140 ml) and the RM was refluxed for 5 hours under N<sub>2</sub>. Solid mass removed by filtration after completion of reaction and filtrate was concentrated and purified by silica gel column chromatography with dichloromethane followed by mix of dichloromethane and methanol. Orange solid (yield=75%) was obtained when solid from column was treated with hexane + dichloromethane mixture.

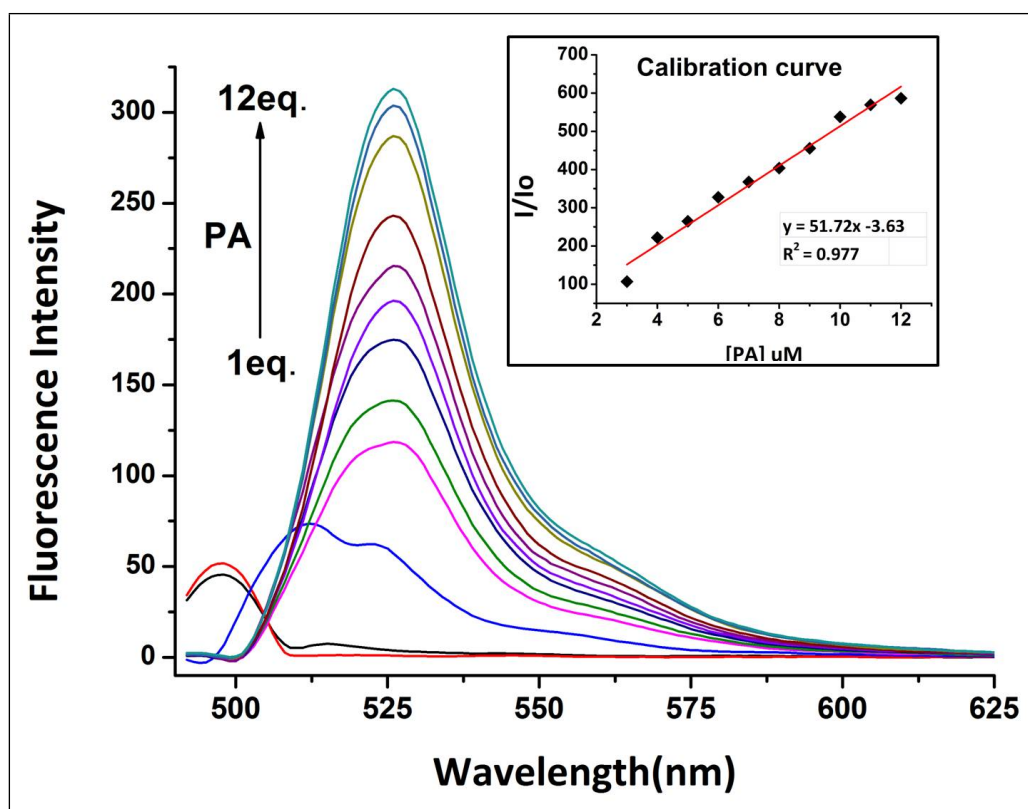

Fig.S1 - Fluorescence titration spectra of BODIPY-2 (1 μM) upon incremental addition of PA (1–12 equiv.) in absolute ethanol,  $\lambda_{exc} = 499$  nm. Inset: Calibration curve of fluorescence intensity as a function of PA equiv. to BODIPY probe.

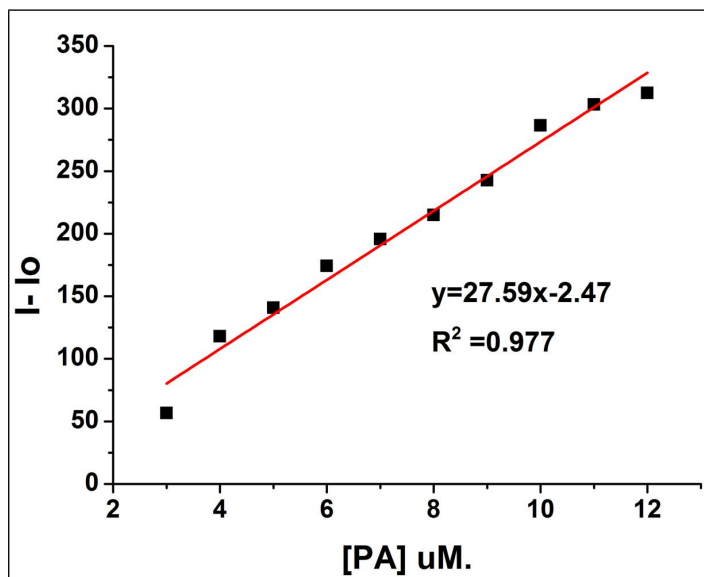

Fig. S2- Plot for detection limit calculation. LOD=0.655ppb was calculated by formula  $LOD=3 \times SD / \text{slope}$ . SD obtained from 10 blank readings.

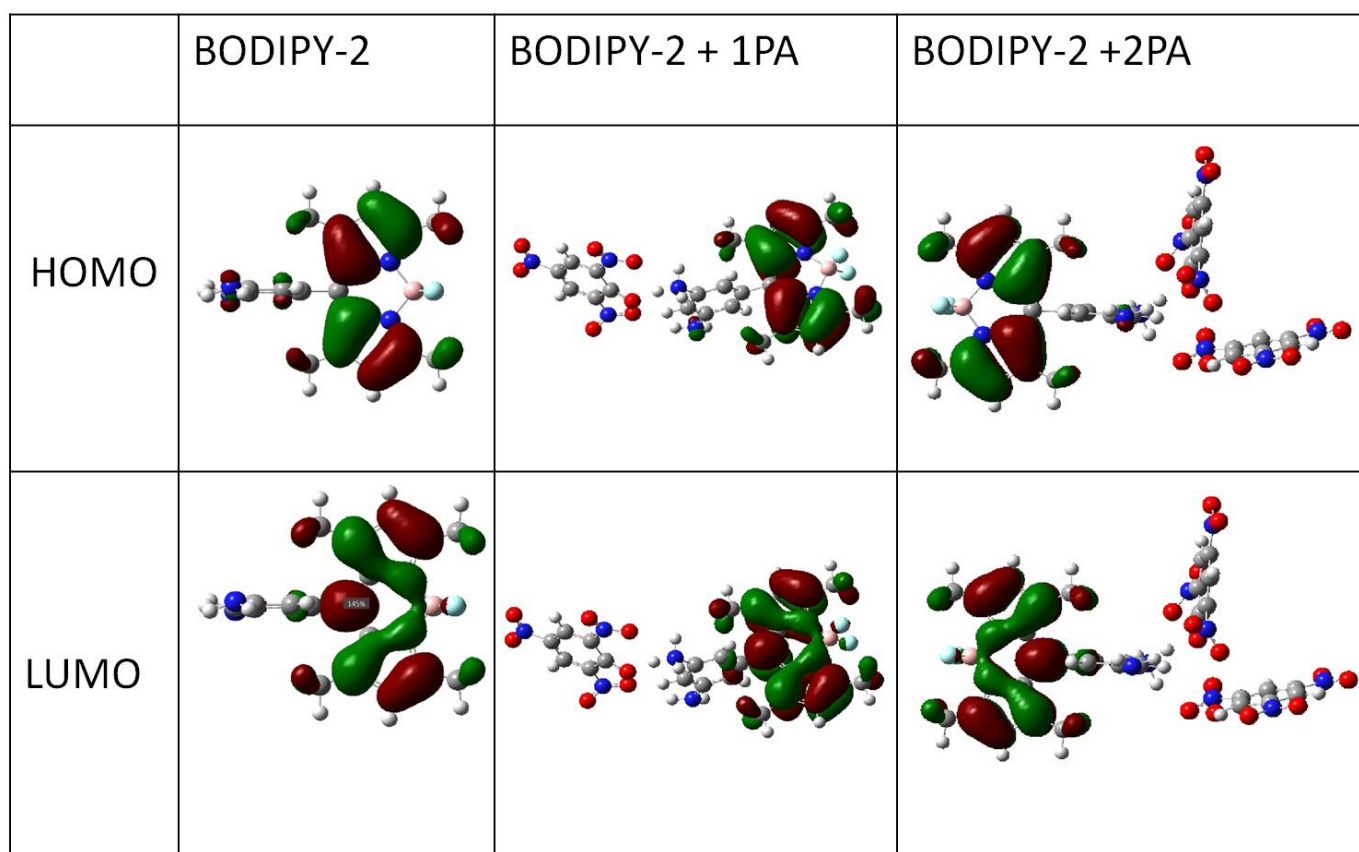

Fig. S3- Isodensity plots for BODIPY-2 and its association with 1 and 2 equivalent of PA from B3LYP/6-31g(d) level optimised output files.

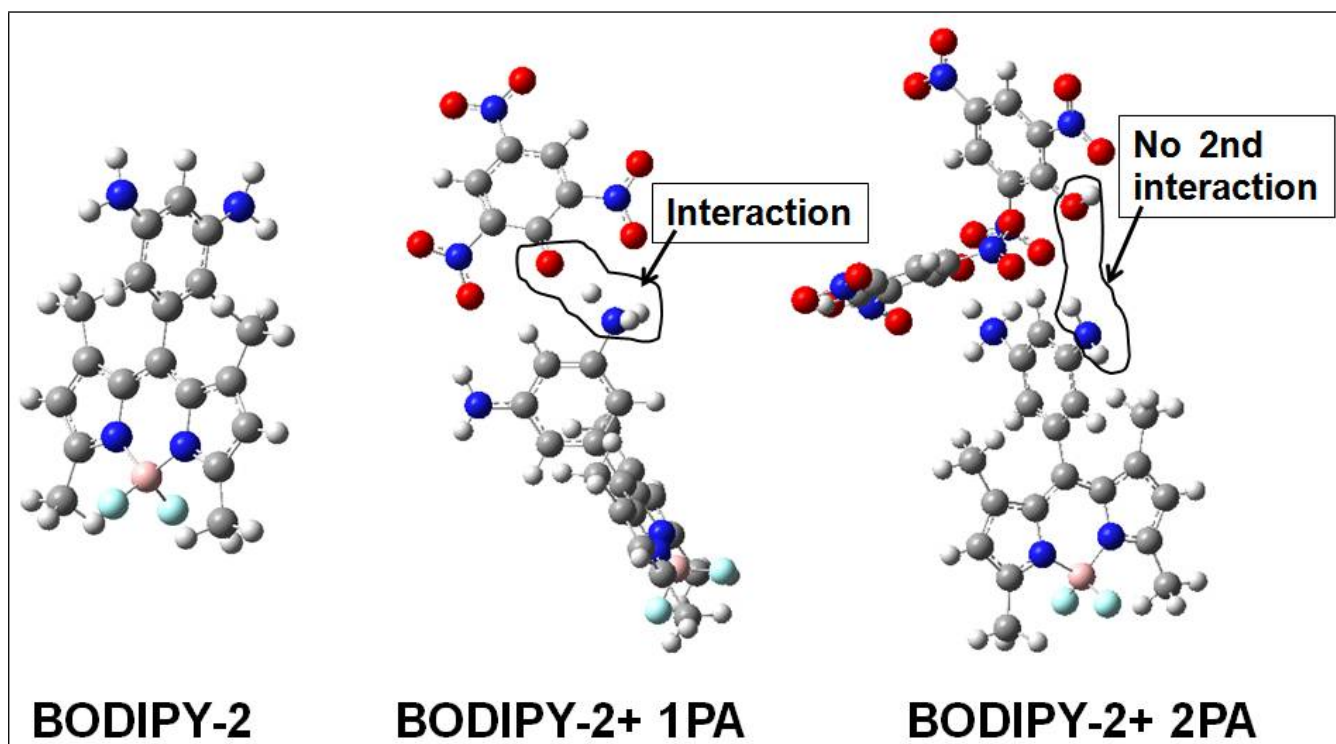

Fig. S4- B3LYP/6-31g(d) Optimised structures with ball–stick model for BODIPY-2 and its association with 1 and 2 equivalent of PA. Ball colour – atom: gray-carbon, dark blue-nitrogen, pink-boron, red-oxygen, sky blue-fluorine, white-hydrogen.

(The fig.S4 is repeated from main paper fig.7 for larger view)

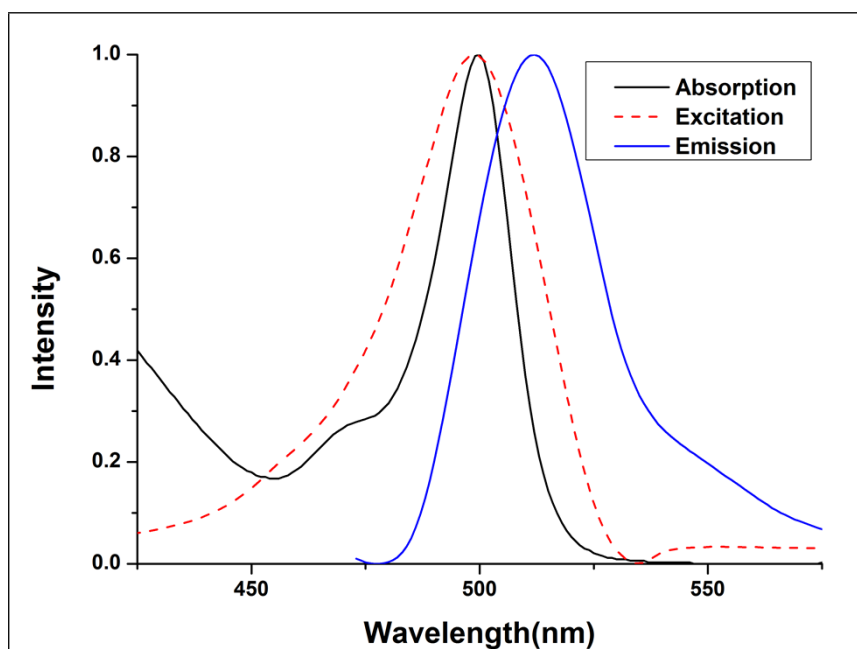

Fig. S5- Normalized absorption, excitation and emission plot of BODIPY-2 + PA.

(Emission & excitation graphs were not promising as unassociated BODIPY-2 is very weak emissive so all three plots were obtained from BODIPY-2 + PA in absolute EtOH.)

**<sup>1</sup>H NMR BODIPY-2:**

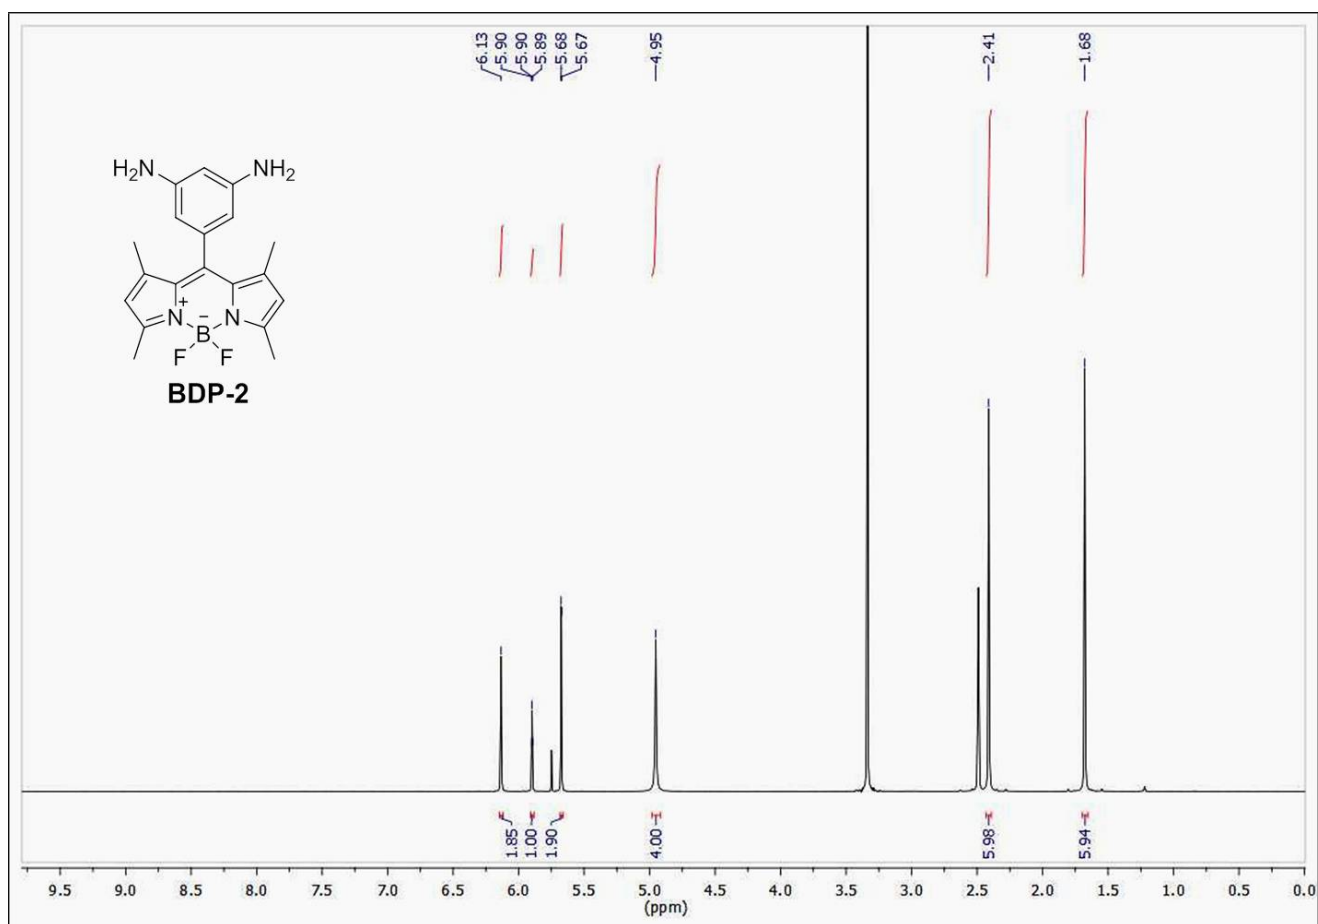

**Fig.S6 - <sup>1</sup>H NMR (DMSO-d<sub>6</sub>, 500 MHz) spectrum of BODIPY-2.**

**<sup>13</sup>C NMR BODIPY-2:**

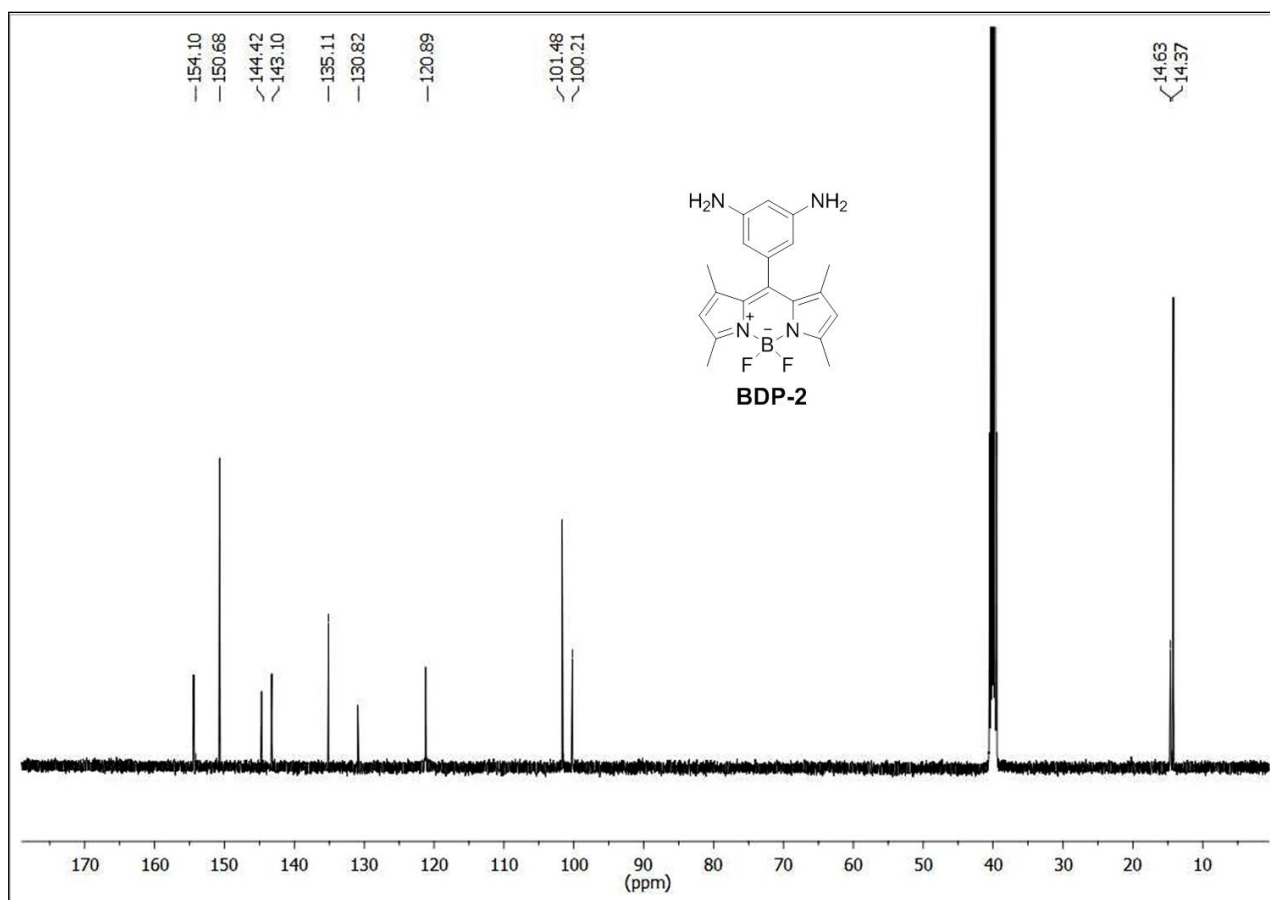

**Fig.S7 - <sup>13</sup>C NMR (DMSO-d<sub>6</sub>, 126 MHz) spectrum of BODIPY-2.**

**<sup>1</sup>H NMR BODIPY-1:**

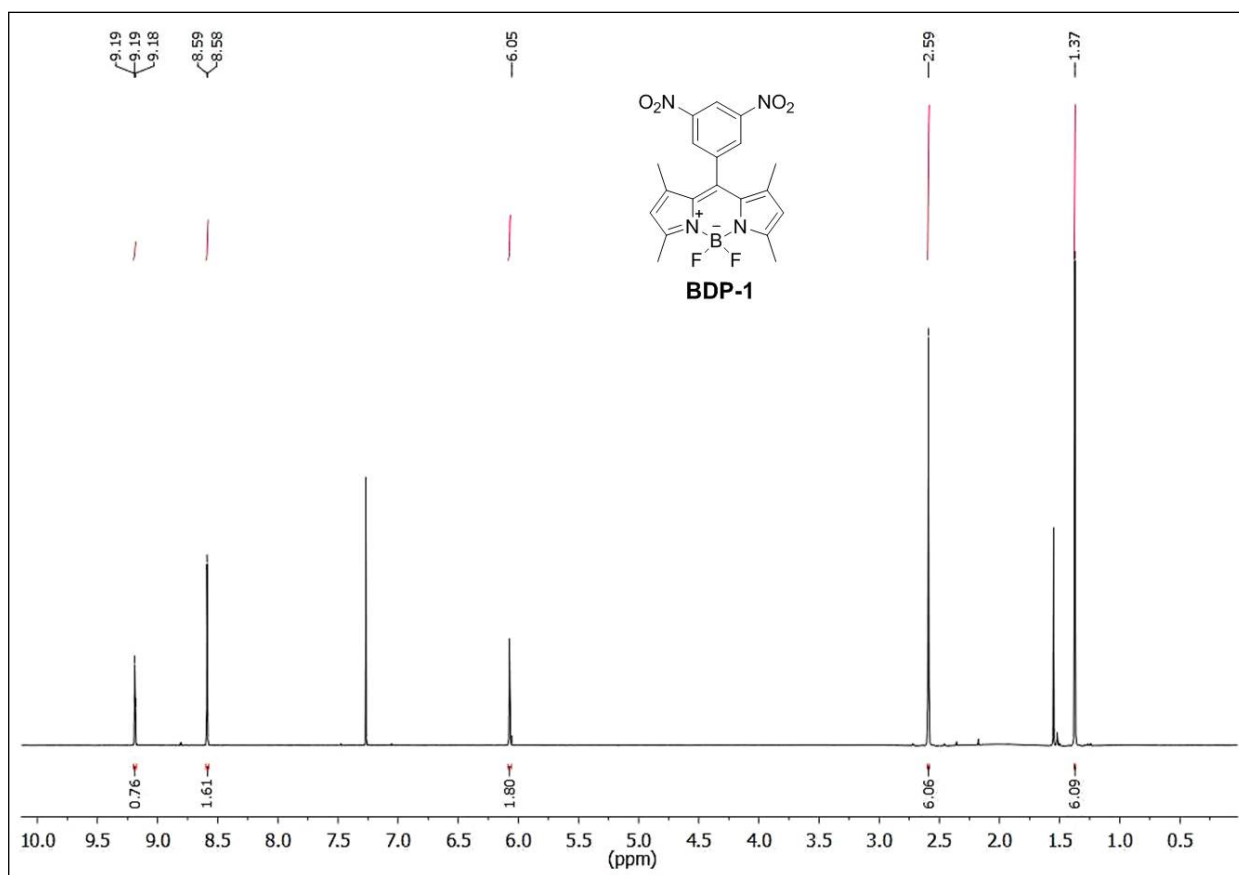

**Fig.S8 - <sup>1</sup>H NMR (cdcl<sub>3</sub>, 500 MHz) spectrum of BODIPY-1.**

## <sup>13</sup>C NMR BODIPY-1:

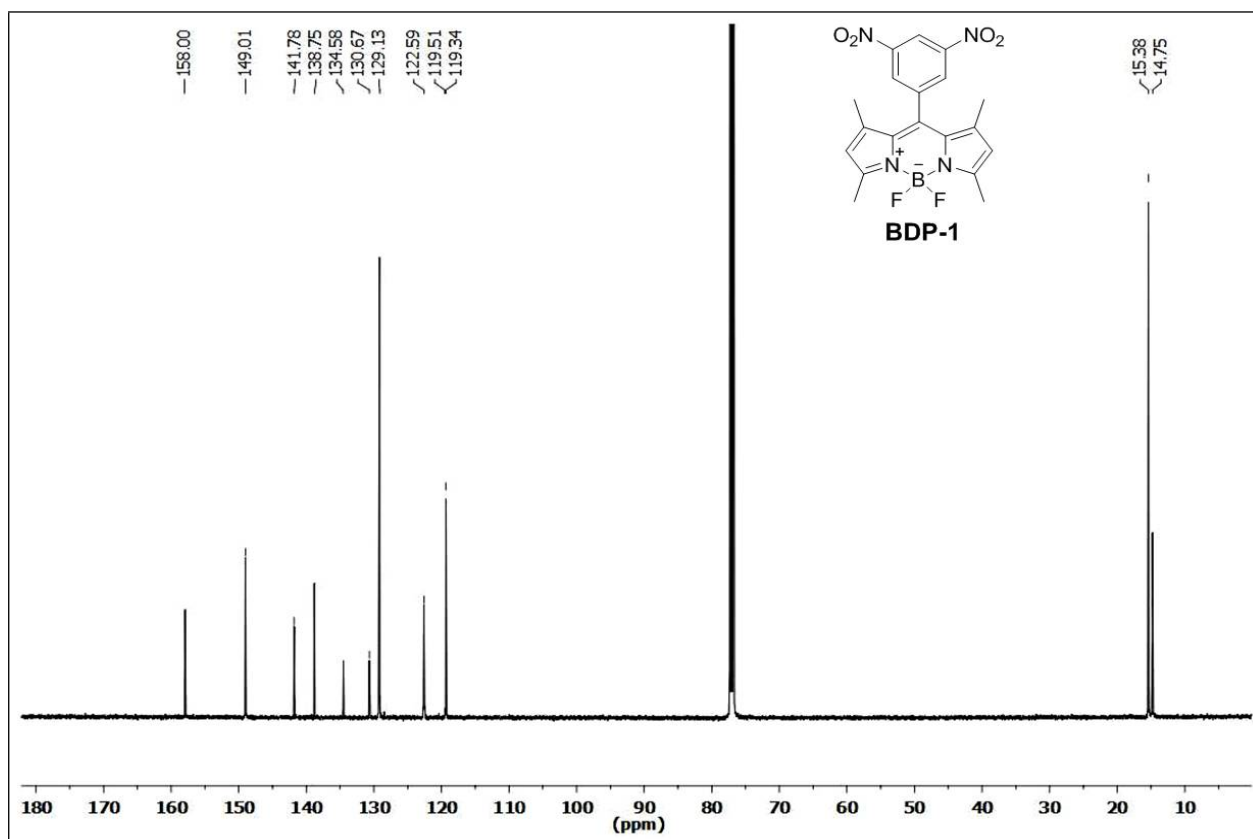

Fig.S9 - <sup>13</sup>C NMR (cdcl<sub>3</sub>, 126 MHz) spectrum of BODIPY-1.

### Calculation of Detection Limit:

Standard deviation from 10 blank readings of BODIPY probe (conc =  $1 \times 10^{-6}$  mol/L) is  $SD(\sigma) = 0.05997$ . From the equation of titration plot ( $y = 27.59x - 2.47$ ,  $R^2 = 0.977$ , fig. S2) slope is = 27.468. So detection limit from formula  $DL = (3 \times SD) / \text{slope} = (3 \times 0.05997) / 27.468 = 0.00655 \mu\text{M} = 6.55 \times 10^{-9} \text{ M}$  (0.65 ppb).

### Calculation of Binding Constant:

Binding constant was determined from Benesi Hildebrand plot (fig.3, main paper). Binding constant =  $c/m$ . From plot ( $y = 3.16 \times 10^{-8}x + 6.03 \times 10^{-4}$ ,  $R^2 = 0.9875$ ) intercept ( $c$ ) =  $6.03 \times 10^{-4}$  and slope =  $3.16 \times 10^{-8}$ . Binding constant ( $K_a$ ) =  $1.91 \times 10^4 \text{ M}^{-1}$ .



## Cartesian co ordinates of optimized files at B3LYP/6-31g(d) level :

**BODIPY-2 : -**

0 1

|   |             |             |             |
|---|-------------|-------------|-------------|
| C | -0.51423600 | -1.22312800 | -0.00797500 |
| C | 0.17666400  | -0.00002200 | -0.00004400 |
| C | -0.51419200 | 1.22310600  | 0.00793600  |
| C | -1.19962800 | 3.37213400  | 0.03070800  |
| H | -1.23185300 | 4.45435600  | 0.04269900  |
| C | -1.19976700 | -3.37212900 | -0.03075200 |
| H | -1.23204000 | -4.45434900 | -0.04277500 |
| C | -3.77190200 | -2.90856800 | -0.02186700 |
| H | -4.27815700 | -2.50371000 | 0.86092400  |
| H | -4.27983400 | -2.48699000 | -0.89580300 |
| H | -3.88046400 | -3.99619300 | -0.03201700 |
| C | -3.77178400 | 2.90868500  | 0.02176300  |
| H | -3.88029800 | 3.99631600  | 0.03185400  |
| H | -4.27803500 | 2.50380400  | -0.86102000 |
| H | -4.27975600 | 2.48717400  | 0.89570800  |
| C | 1.34712400  | 3.11606900  | 0.03386100  |
| H | 1.92232700  | 2.74404800  | 0.88819500  |
| H | 1.32671100  | 4.20938200  | 0.08477100  |
| H | 1.90365500  | 2.82710300  | -0.86406200 |
| C | 1.34699200  | -3.11618900 | -0.03374900 |
| H | 1.92224400  | -2.74421300 | -0.88806900 |
| H | 1.90350800  | -2.82723800 | 0.86418800  |
| H | 1.32652200  | -4.20950200 | -0.08464300 |
| C | -2.32742000 | -2.52662900 | -0.01964300 |
| C | -2.32731900 | 2.52668300  | 0.01959500  |
| C | -0.05500800 | 2.58284400  | 0.02422600  |

|   |             |             |             |
|---|-------------|-------------|-------------|
| C | -0.05511200 | -2.58289000 | -0.02417400 |
| N | -1.91443200 | 1.24472200  | 0.00668100  |
| N | -1.91447900 | -1.24468700 | -0.00664500 |
| B | -2.84966300 | 0.00003600  | 0.00003500  |
| F | -3.64622000 | 0.00603800  | -1.14459600 |
| F | -3.64618500 | -0.00593600 | 1.14469200  |
| C | 3.77003400  | -0.05596700 | 1.21741400  |
| C | 4.46189900  | -0.00002300 | 0.00000000  |
| C | 3.77005900  | 0.05592700  | -1.21742800 |
| C | 2.36365500  | 0.05414500  | -1.21313200 |
| C | 1.67306600  | -0.00003500 | -0.00002900 |
| C | 2.36363100  | -0.05418900 | 1.21308900  |
| H | 5.55040300  | -0.00002000 | 0.00001100  |
| H | 1.81515000  | 0.10339800  | -2.14989100 |
| H | 1.81510600  | -0.10342900 | 2.14983800  |
| N | 4.46942200  | 0.17507200  | -2.41999100 |
| H | 5.41150600  | -0.19551300 | -2.40822300 |
| H | 3.96107700  | -0.12892400 | -3.24100300 |
| N | 4.46937400  | -0.17509700 | 2.41999200  |
| H | 5.41145700  | 0.19548900  | 2.40824000  |
| H | 3.96101300  | 0.12890800  | 3.24099000  |

**BODIPY-2 + 1eq. PA:-**

0 1

|   |            |             |             |
|---|------------|-------------|-------------|
| C | 4.36108100 | -0.98576600 | 0.44080700  |
| C | 3.41294000 | -0.11776300 | -0.12411700 |
| C | 3.78280500 | 1.13633900  | -0.63651300 |
| C | 3.93477900 | 3.18703200  | -1.56417900 |
| H | 3.71258500 | 4.13113100  | -2.04518000 |
| C | 5.52477300 | -2.65550200 | 1.41352200  |
| H | 5.81207400 | -3.58431000 | 1.88978900  |
| C | 7.88094300 | -1.52770700 | 1.31499100  |
| H | 8.41095900 | -1.40217900 | 0.36479500  |
| H | 8.12925000 | -0.65662400 | 1.93048500  |
| H | 8.23978700 | -2.43340900 | 1.81022800  |
| C | 6.50943200 | 3.51067300  | -1.25070300 |
| H | 6.35455600 | 4.49093800  | -1.70825900 |
| H | 6.96212700 | 3.64053000  | -0.26205600 |
| H | 7.22618700 | 2.94137100  | -1.85214900 |
| C | 1.55395600 | 2.25631300  | -1.55802700 |
| H | 1.21572400 | 1.42894100  | -2.19045800 |
| H | 1.32810500 | 3.19268100  | -2.07718500 |
| H | 0.94631000 | 2.22406300  | -0.64665200 |
| C | 3.02588400 | -3.15541800 | 1.19965200  |
| H | 2.25585300 | -2.66221600 | 1.80309200  |
| H | 2.55770500 | -3.41579900 | 0.24429700  |
| H | 3.30310200 | -4.08650200 | 1.70335000  |
| C | 6.40677400 | -1.60373200 | 1.08735700  |
| C | 5.21517900 | 2.77352200  | -1.14026100 |
| C | 3.02321600 | 2.18381700  | -1.26114200 |
| C | 4.24216700 | -2.29474200 | 1.02106100  |

|   |             |             |             |
|---|-------------|-------------|-------------|
| N | 5.11943100  | 1.54946000  | -0.58760900 |
| N | 5.70776200  | -0.60976300 | 0.50745500  |
| B | 6.31030400  | 0.73830600  | 0.00743600  |
| F | 6.87343700  | 1.43265800  | 1.07540000  |
| F | 7.26232900  | 0.49817700  | -0.97897500 |
| C | 0.15815900  | -1.65351600 | -1.37345900 |
| C | -0.70862100 | -1.32892000 | -0.31051800 |
| C | -0.21454100 | -0.61777300 | 0.76707000  |
| C | 1.11347600  | -0.20802600 | 0.87134000  |
| C | 1.97768900  | -0.53825000 | -0.18206400 |
| C | 1.50535300  | -1.24923900 | -1.28846300 |
| H | -1.75548100 | -1.60563900 | -0.35345400 |
| H | 1.47618600  | 0.35281800  | 1.72760500  |
| H | 2.19206200  | -1.49044900 | -2.09579500 |
| N | -1.17726400 | -0.27417400 | 1.83661800  |
| H | -1.00258000 | -0.79724200 | 2.70028000  |
| H | -1.15890100 | 0.71954500  | 2.08328400  |
| N | -0.32308100 | -2.38262200 | -2.43662600 |
| H | -1.32953500 | -2.40569800 | -2.55853900 |
| H | 0.20471700  | -2.36461100 | -3.29786000 |
| C | -5.28915900 | -0.79846900 | -0.66982800 |
| C | -6.55511500 | -0.34458800 | -0.97330700 |
| C | -7.16011400 | 0.59838000  | -0.13899600 |
| C | -6.50669000 | 1.07789400  | 0.98854500  |
| C | -5.23767500 | 0.61122000  | 1.30312100  |
| C | -4.55247000 | -0.40731600 | 0.52272500  |
| H | -7.06940200 | -0.70082200 | -1.85689600 |
| H | -6.98299700 | 1.81609200  | 1.62042800  |
| N | -4.61991300 | 1.18649300  | 2.48585400  |

|   |             |             |             |
|---|-------------|-------------|-------------|
| N | -8.48542700 | 1.10343300  | -0.47078200 |
| N | -4.68119500 | -1.71334500 | -1.63466600 |
| O | -3.47911900 | -0.98024700 | 0.85178000  |
| H | -2.20466000 | -0.47496900 | 1.53455700  |
| O | -3.45972700 | -1.64092400 | -1.81741400 |
| O | -5.33766500 | 1.77202500  | 3.29513100  |
| O | -9.02766100 | 0.65937100  | -1.48516400 |
| O | -5.42328900 | -2.47253300 | -2.25528200 |
| O | -8.98416200 | 1.94277500  | 0.28144900  |
| O | -3.38895900 | 1.09030200  | 2.62623800  |

**BODIPY-2 +2 eq. PA :-**

0 1

|   |            |             |             |
|---|------------|-------------|-------------|
| C | 5.30815800 | -1.64763200 | -0.04828700 |
| C | 4.56390500 | -0.46009700 | -0.14085500 |
| C | 5.18048600 | 0.79851700  | -0.05882000 |
| C | 5.74939600 | 2.98022600  | 0.01437900  |
| H | 5.72728100 | 4.06256000  | 0.00989700  |
| C | 6.09810700 | -3.75826900 | 0.04860100  |
| H | 6.18702800 | -4.83720000 | 0.05651300  |
| C | 8.62174700 | -3.15985600 | 0.37564500  |
| H | 9.21077700 | -2.74252400 | -0.44817000 |
| H | 8.99639300 | -2.69769200 | 1.29491300  |
| H | 8.78322600 | -4.23968800 | 0.42226300  |
| C | 8.31996700 | 2.64752700  | 0.35395700  |
| H | 8.37411400 | 3.73897800  | 0.35520700  |
| H | 8.72559100 | 2.26492400  | 1.29668700  |
| H | 8.95787000 | 2.25453400  | -0.44466100 |

|   |             |             |             |
|---|-------------|-------------|-------------|
| C | 3.24325600  | 2.60156200  | -0.31864700 |
| H | 2.80930200  | 2.23937200  | -1.25687900 |
| H | 3.21508000  | 3.69524900  | -0.33539200 |
| H | 2.58301100  | 2.26198500  | 0.48697400  |
| C | 3.56503000  | -3.64201400 | -0.28026800 |
| H | 2.86531700  | -3.33541600 | 0.50503900  |
| H | 3.10788300  | -3.36324100 | -1.23569100 |
| H | 3.64471300  | -4.73299600 | -0.25146200 |
| C | 7.17158000  | -2.85406400 | 0.19023100  |
| C | 6.90980400  | 2.19245400  | 0.16807900  |
| C | 4.65690300  | 2.13491500  | -0.12907600 |
| C | 4.92407600  | -3.03107600 | -0.10117100 |
| N | 6.56542000  | 0.89168500  | 0.12319900  |
| N | 6.69520600  | -1.59602800 | 0.13222900  |
| B | 7.55721800  | -0.30344900 | 0.25757600  |
| F | 8.18166900  | -0.26574900 | 1.50180200  |
| F | 8.49984000  | -0.25891700 | -0.76592900 |
| C | 1.14503500  | -0.67792000 | -1.81349100 |
| C | 0.30495000  | -0.71789600 | -0.68432600 |
| C | 0.86924700  | -0.63847500 | 0.58089500  |
| C | 2.23992300  | -0.55280800 | 0.79676200  |
| C | 3.08108800  | -0.54141400 | -0.32622000 |
| C | 2.53875300  | -0.59776400 | -1.60953800 |
| H | -0.76973500 | -0.80354300 | -0.79643800 |
| H | 2.65776400  | -0.49345500 | 1.79730800  |
| H | 3.20481400  | -0.57467500 | -2.46824300 |
| N | -0.05228300 | -0.63576700 | 1.73242300  |
| H | -0.45190800 | -1.57529100 | 1.90632100  |
| H | 0.39089900  | -0.28909300 | 2.58584900  |

|   |             |             |             |
|---|-------------|-------------|-------------|
| N | 0.60769500  | -0.75822800 | -3.08249900 |
| H | -0.34570700 | -0.42929400 | -3.20110300 |
| H | 1.21249700  | -0.47501000 | -3.84223900 |
| C | -2.60474300 | 2.01286200  | -1.06081700 |
| C | -2.74111700 | 3.30548100  | -1.52828100 |
| C | -2.70327600 | 4.36148400  | -0.61902500 |
| C | -2.44970000 | 4.13195900  | 0.73172200  |
| C | -2.23114500 | 2.83999300  | 1.17685500  |
| C | -2.34907600 | 1.66722100  | 0.32857800  |
| H | -2.88446800 | 3.50085900  | -2.58379300 |
| H | -2.40001900 | 4.96202600  | 1.42504400  |
| C | -6.51274300 | -2.07738200 | -0.31134500 |
| C | -5.34800600 | -2.43474400 | -0.97669700 |
| C | -4.08873000 | -2.55065700 | -0.31276400 |
| C | -4.09423700 | -2.24077900 | 1.07719800  |
| C | -5.25313700 | -1.87322400 | 1.74506000  |
| C | -6.45307000 | -1.81004900 | 1.04795300  |
| H | -7.44896900 | -2.00804100 | -0.85010400 |
| H | -5.21621800 | -1.62894100 | 2.79873000  |
| N | -1.86138000 | 2.69091800  | 2.57924500  |
| N | -2.89646500 | 5.72387100  | -1.09404900 |
| N | -2.61341900 | 0.94735900  | -2.04804200 |
| N | -5.45564500 | -2.69266400 | -2.41041700 |
| N | -2.86393300 | -2.24047300 | 1.86035400  |
| N | -7.68251100 | -1.44093100 | 1.76349400  |
| O | -2.98446200 | -2.90532800 | -0.92817800 |
| H | -3.20956500 | -2.99019600 | -1.89554500 |
| O | -2.21985800 | 0.47680700  | 0.72573200  |
| H | -0.89775500 | -0.00904900 | 1.53307500  |

|   |             |             |             |
|---|-------------|-------------|-------------|
| O | -3.17589500 | -0.11370400 | -1.77111800 |
| O | -2.25146300 | 3.54220300  | 3.37536000  |
| O | -3.11837600 | 5.88279900  | -2.29669100 |
| O | -1.86260900 | -2.79779300 | 1.38955800  |
| O | -7.58619100 | -1.22069100 | 2.96809100  |
| O | -4.42287200 | -3.02837500 | -3.02627400 |
| O | -6.54596100 | -2.57725200 | -2.94529400 |
| O | -8.71833300 | -1.38219200 | 1.10564900  |
| O | -2.87436600 | -1.67380100 | 2.94920200  |
| O | -2.02846600 | 1.15281800  | -3.12182000 |
| O | -2.82536900 | 6.63443200  | -0.26664700 |
| O | -1.13856200 | 1.73600400  | 2.89691700  |

---
